# Supplementary material
Source: PubMed Central journal article supplement (PMC7497728)
Supplement: NIHMS1599965-supplement-8.pdf [file NIHMS1599965-supplement-8.pdf]

**Table S2: Electrophysiological Properties of DG granule cells in IL-33 cKO vs littermate controls, related to Figure 3K-M.**

|                                      | <b>Decay time (ms)</b> | <b>Half-width (ms)</b> | <b>Resting membrane potential (mV)</b> | <b>Membrane capacitance (pF)</b> | <b>Input resistance (mOhm)</b> |
|--------------------------------------|------------------------|------------------------|----------------------------------------|----------------------------------|--------------------------------|
| <i>Il33<sup>fl/fl</sup></i>          | 1.66 ± 0.30            | 2.18 ± 0.32            | -65.9 ± 1.0                            | 76.86 ± 3.11                     | 366.36 ± 18.18                 |
| <i>Syn1cre: Il33<sup>fl/fl</sup></i> | 2.16 ± 0.24            | 2.62 ± 0.27            | -65.1 ± 1.0                            | 74.10 ± 4.66                     | 375.74 ± 21.39                 |
| p-value                              | 0.21                   | 0.29                   | 0.75                                   | 0.86                             | 0.74                           |
